# Supplementary material for: Characterization and expression of a long neuropeptide F (NPF) receptor in the Chagas disease vector Rhodnius prolixus
Source: PubMed Central journal article supplement (PMC6095579; doi:10.1371/journal.pone.0202425), 2018-08-16
Supplement: pone.0202425.s001.pdf [file pone.0202425.s001.pdf]

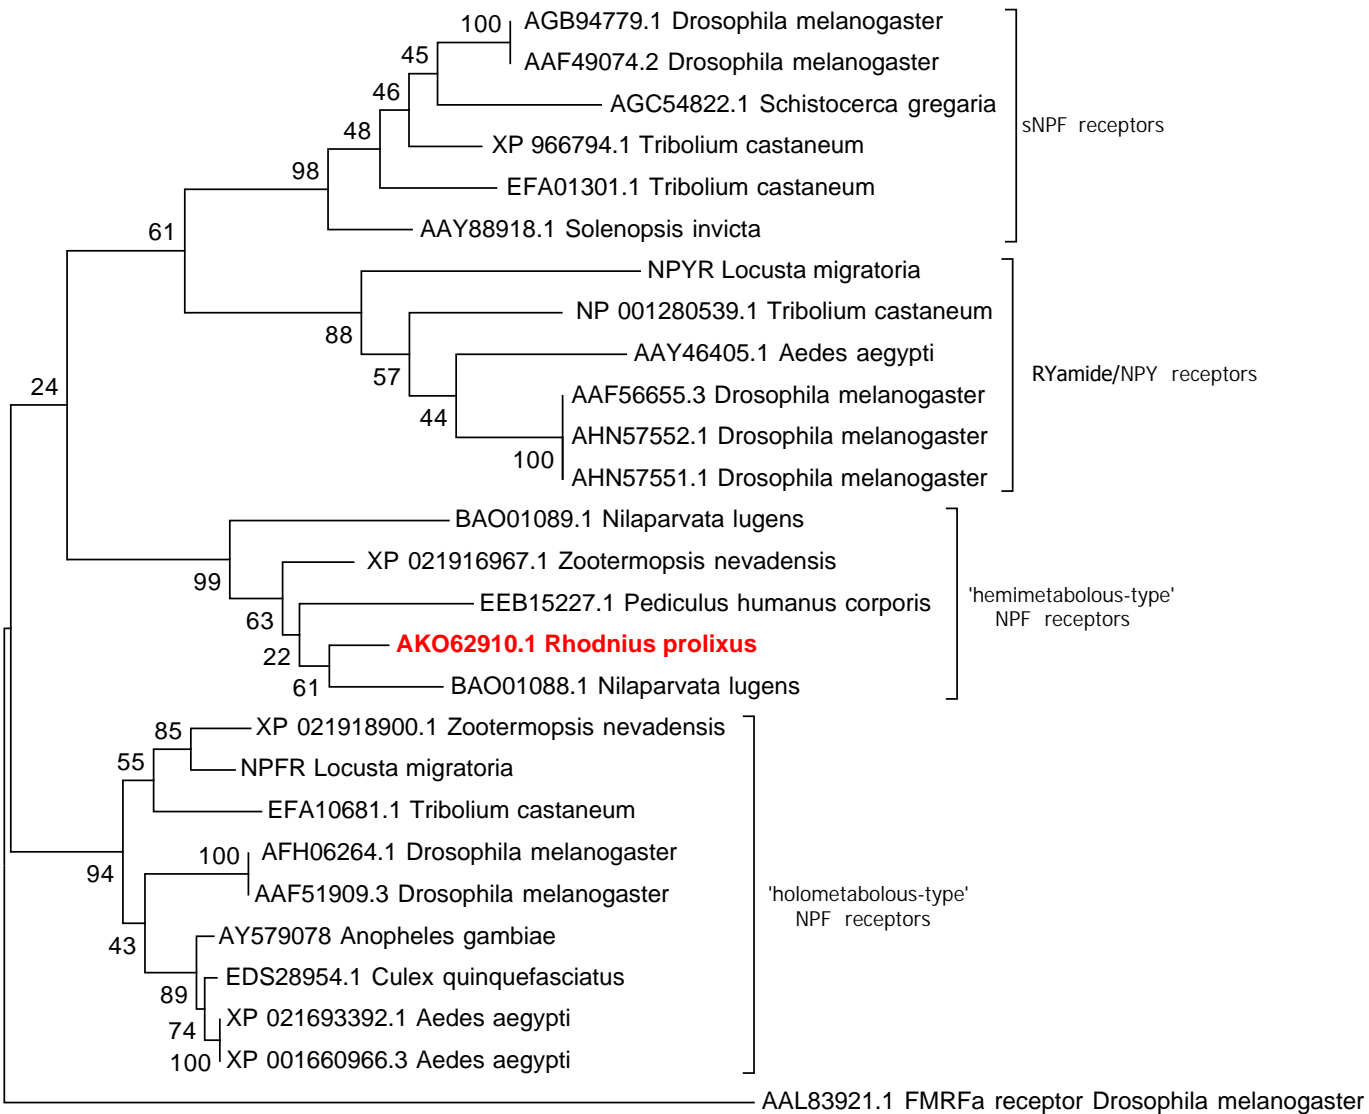

0.20
